# Supplementary material for: Make America Christian Again: Christian Nationalism and Voting for Donald Trump in the 2016 Presidential Election
Source: Oxford University Press journal article supplement (doi:10.1093/socrel/srx070), 2018-01-01
Supplement: srx070_suppl_supplementary_material.docx [file srx070_suppl_supplementary_material.docx]

Supplementary Table 1: Comparison of the 2017 BRS to the 2016 GSS

|  | 2017 BRS |  | 2016 GSS |
| --- | --- | --- | --- |
| Age | 49.7 | Age | 47.6 |
| Women | 52.3 | Women | 54.8 |
| Marital status |  | Marital status |  |
| *Single/never married* | 21.1 | *Single/never married* | 27.4 |
| *Married* | 50.2 | *Married* | 49.9 |
| Non-white | 35.2 | Non-white | 26.5 |
| Education |  | Education |  |
| *Less than HS* | 9.0 | *Less than HS* | 13.5 |
| *HS grad* | 27.0 | *HS grad* | 29.2 |
| *Some college* | 31.4 | *Some college* | 26.3 |
| *BA* | 15.3 | *BA* | 16.8 |
| *Post-BA* | 17.3 | *Post-BA* | 14.3 |
| Income |  | Income |  |
| *$10,000 or less* | 9.0 | *$9,999 or less* | 6.9 |
| *$10,001-$20,000* | 12.4 | *$10,000-$19,999* | 9.0 |
| *$20,001-$35,000* | 14.3 | *$20,000-$34,999* | 15.9 |
| *$35,001-$50,000* | 15.4 | *$35,000-$49,999* | 12.9 |
| *$50,001-$100,000* | 26.2 | *$50,000-$109,999* | 35.1 |
| *$100,001-$150,00* | 12.4 | *$110,000-149,999* | 10.3 |
| *$150,001 or more* | 10.6 | *$150,000 or more* | 10.4 |
| Political Ideology |  | Political Ideology |  |
| *Extremely conservative* | 3.5 | *Extremely conservative* | 4.2 |
| *Conservative* | 21.7 | *Conservative* | 15.8 |
| *Leaning conservative* | 10.2 | *Leaning conservative* | 14.3 |
| *Moderate* | 37.0 | *Moderate* | 37.2 |
| *Leaning liberal* | 8.5 | *Leaning liberal* | 11.3 |
| *Liberal* | 15.8 | *Liberal* | 12.4 |
| *Extremely liberal* | 3.4 | *Extremely liberal* | 4.8 |
| Attend religious services |  | Attend religious services |  |
| *Never* | 27.2 | *Never* | 25.0 |
| *Less than once a year* | 6.9 | *Less than once a year* | 5.9 |
| *Once or twice a year* | 12.7 | *Once a year* | 13.3 |
| *Several times a year* | 11.5 | *Several times a year* | 11.1 |
| *Once a month* | 4.2 | *Once a month* | 7.0 |
| *2-3 times a month* | 8.3 | *2-3 times a month* | 8.7 |
| *About once a week* | 21.2 | *Nearly every week* | 4.4 |
| *Several times a week* | 8.0 | *Every week* | 17.5 |

Note: All data weighted using *weight* for 2017 BRS and *wtssall* for GSS 2016.

Supplementary Table 2: Factor Analysis of Christian nationalism, Islamophobia, Xenophobia, and Racial Bias Measures

|  | Factor Loading Score |
| --- | --- |
| Federal government declare US Christian nation | **.698** |
| Federal government advocate Christian values | **.767** |
| Federal government should enforce strict church/state separation (reverse coded) | **.480** |
| Federal government allow display of religious symbols in public spaces | **.745** |
| Success of US is part of God’s plan | **.800** |
| Federal government should allow prayer in public schools | **.838** |
| Muslims hold values that are morally inferior to the values of people like me | .192 |
| Muslims want to limit the personal freedoms of people like me | .173 |
| Muslims endanger the physical safety of people like me | .222 |
| Refugees from the Middle East pose a terrorist threat to the United States | .267 |
| Illegal immigrants from Mexico are mostly dangerous criminals | .289 |
| Police officers in the United States treat blacks the same as whites | .212 |
| Police officers in the United States shoot blacks more often because they are more violent than whites | .088 |

Note: 2017 BRS (Weighted MI Data); Varimax Rotated Factor Pattern

Supplementary Table 3: Binary Logistic Regression Models Predicting Voting for Trump by Christian Nation Views

|  | Model 1 | | Model 2 | | Model 3 | | Model 4 | |
| --- | --- | --- | --- | --- | --- | --- | --- | --- |
|  | β | OR | β | OR | β | OR | β | OR |
| U.S. Christian nation | --- | --- | .16* | 1.91 | .36** | 4.45 | .31*** | 3.52 |
| U.S. Christian nation in past | -.16† | .54 | --- | --- | .22 | 2.35 | .16 | 1.85 |
| U.S. never Christian nation | -.34*** | .22 | -.20* | .40 | --- | --- | -.07 | .73 |
| Unsure U.S. Christian nation | -.28*** | .29 | -.14* | .53 | .05*** | 1.23 | --- | --- |
| Islamophobia | .33*** | 1.19 | .33*** | 1.19 | .33 | --- | .33*** | 1.18 |
| Illegal immigrant | .03 | --- | .03 | --- | .03† | 1.24 | .03 | --- |
| Racial bias | .11 | --- | .11† | 1.16 | .12 | --- | .11† | 1.16 |
| Sexism | .01 | --- | .01 | --- | .01 | --- | .01 | --- |
| Economic satisfaction | -.04 | --- | -.04 | --- | -.04 | --- | -.04 | --- |
| Religious practice | -.01 | --- | -.01 | --- | -.01 | --- | -.01 | --- |
| Bible Inspired | -.04 | --- | -.05 | --- | -.05 | --- | -.05 | --- |
| Bible Errors | .01 | --- | .01 | --- | .01 | --- | .01 | --- |
| Bible Legends | -.11 | --- | -.10 | --- | -.11 | --- | -.11 | --- |
| Bible Don’t Know | -.12 | --- | -.12 | --- | -.12 | --- | -.12 | --- |
| Mainline | -.03 | --- | -.03 | --- | -.03 | --- | -.03 | --- |
| Black Protestant | .09 | --- | .08 | --- | .08 | --- | .08 | --- |
| Catholic | .01 | --- | .01 | --- | .01 | --- | .01 | --- |
| Other | -.10† | .50 | -.10† | .49 | -.11† | .49 | -.11† | .49 |
| None | -.12 | --- | -.12 | --- | -.12 | --- | -.12 | --- |
| Age | -.02 | --- | -.02 | --- | -.02 | --- | -.02 | --- |
| Women | .06 | --- | .06 | --- | .06 | --- | .06 | --- |
| Black | -.46** | .06 | -.45** | .06 | -.46** | .06 | -.46** | .06 |
| Other Race | -.15** | .50 | -.15** | .51 | -.15** | .51 | -.15** | .50 |
| Married | -.01 | --- | -.01 | --- | -.02 | --- | -.02 | --- |
| Urban | -.19** | .43 | -.19** | .43 | -.19** | .43 | -.19** | .43 |
| Independent | -.16* | .53 | -.16* | .53 | -.16* | .53 | -.16* | .53 |
| Democrat | -.66*** | .08 | -.66*** | .08 | -.66*** | .08 | -.65*** | .08 |
| Political conservatism | .59*** | 2.01 | .59*** | 2.01 | .59*** | 2.01 | .59*** | 2.01 |
| Education | -.06 | --- | -.06 | --- | -.06 | --- | -.06 | --- |
| Income | .22** | 1.27 | .22** | 1.27 | .22** | 1.27 | .22** | 1.27 |
|  |  |  |  |  |  |  |  |  |
| Intercept | -4.591*** |  | -5.180*** |  | -6.062*** |  | -5.780*** |  |
| N | 1,233 |  | 1,233 |  | 1,233 |  | 1,233 |  |
| PRE | .533 |  | .533 |  | .533 |  | .533 |  |

Source: 2017 Baylor Religion Survey (Weighted MI Data)

***p<0.001; **p<0.01; *p<0.05; †p<0.10

Supplementary Figure 1: Predicted Probabilities of Voting for Trump by Christian Nation Narratives and Political Party

Note: All variables in predicted probability model set to means, including political conservatism
